# Supplementary material
Source: PubMed Central journal article supplement (PMC122172)
Supplement: pnas_99_3_1229__2.pdf [file pnas_99_3_1229__2.pdf]

**Table 2.** Survey of three-dimensional structures of chemokines

|                        | Chemokine                                     | Code*       | Exp.  | Oligomerization      | Mutation                  | Ref. |
|------------------------|-----------------------------------------------|-------------|-------|----------------------|---------------------------|------|
| <b>CXC</b>             |                                               |             |       |                      |                           |      |
| CXCL1                  | MGSA- $\alpha$ (Gro $\alpha$ )                | 1MGS        | NMR   | $\beta$ -Sheet dimer | wt                        | 1    |
|                        |                                               | 1MSG (1MSH) | NMR   | $\beta$ -Sheet dimer | C-terminal (N73)          | 2    |
| CXCL2                  | MIP-2 $\alpha$ (Gro $\beta$ /MGSA- $\alpha$ ) | 1QNK        | NMR   | $\beta$ -Sheet dimer | N-terminal trunc (1–4)    | 3    |
| CXCL3                  | MIP-2 $\beta$ (Gro $\gamma$ )                 | 1MI2        | NMR   | $\beta$ -Sheet dimer | Murine wt                 | 4    |
| CXCL4                  | PF4                                           | 1RHP        | X-ray | Tetramer             | wt                        | 5    |
|                        |                                               | 1PFM (1PFN) | NMR   | Tetramer             | Chimeric <sup>†</sup>     | 6    |
|                        |                                               | 1NAP        | X-ray | Tetramer             | M26L                      | 7    |
| CXCL7                  | NAP-2                                         | 1TVX        | X-ray | Tetramer             | M26L + insert DSDLY       | 8    |
|                        |                                               | n.a.        | NMR   | Monomer              |                           | 9    |
| CXCL8                  | IL-8 (NAP-1)                                  | 1IL8 (2IL8) | NMR   | $\beta$ -Sheet dimer | wt                        | 10   |
|                        |                                               | 3IL8        | X-ray | $\beta$ -Sheet dimer | wt                        | 11   |
|                        |                                               | 1IKL (1IKM) | NMR   | Monomer              | Del(1-3)+Met <sup>‡</sup> | 12   |
|                        |                                               | 1ICW        | X-ray | $\beta$ -Sheet dimer | E38C/C50A                 | 13   |
|                        |                                               | 1ILQ (1ILP) | NMR   | Dimer + receptor     | wt                        | 14   |
|                        |                                               | 1QE6        | X-ray | $\beta$ -Sheet dimer | L5C/H33C                  | 15   |
| CXCL12                 | SDF-1 (PBSF)                                  | 1SDF (2SDF) | NMR   | Monomer              | wt                        | 16   |
|                        |                                               | 1A15        | X-ray | $\beta$ -Sheet dimer | N33A (synthetic)          | 17   |
|                        |                                               | 1QG7        | X-ray | $\beta$ -Sheet dimer | wt                        | 18   |
| <b>CC</b>              |                                               |             |       |                      |                           |      |
| CCL1                   | I309                                          | 1EL0        | NMR   | Monomer              | wt                        | 19   |
| CCL2                   | MCP-1                                         | 1DOM        | NMR   | N-terminal dimer     | wt                        | 20   |
|                        |                                               | 1DOK        | X-ray | N-terminal dimer     | Ins (Met0)                | 21   |
|                        |                                               | 1DOL        | X-ray | N-terminal dimer     | Ins (Met0)                | 21   |
| CCL3                   | MIP-1 $\alpha$                                | 1B53 (1B50) | NMR   | N-terminal dimer     | D26A                      | 22   |
| CCL4                   | MIP-1 $\beta$                                 | 1HUM        | NMR   | N-terminal dimer     | wt                        | 23   |
|                        |                                               | 1JE4        | NMR   | Monomer              | F13A                      | 24   |
| CCL5                   | RANTES                                        | 1RTO (1RTN) | NMR   | N-terminal dimer     | wt                        | 25   |
|                        |                                               | 1HRJ        | NMR   | N-terminal dimer     | wt (acidic pH)            | 26   |
|                        |                                               | 1B3A        | X-ray | N-terminal dimer     | AOP-RANTES                | 27   |
|                        |                                               | 1EQT        | X-ray | N-terminal dimer     | MET-RANTES                | 28   |
| CCL7                   | MCP-3                                         | 1BO0        | NMR   | Monomer              | wt                        | 29   |
|                        |                                               | 1NCV        | NMR   | $\beta$ -Sheet dimer | wt                        | 30   |
| CCL8                   | MCP-2                                         | 1ESR        | X-ray | N-terminal dimer     | wt                        | 31   |
| CCL11                  | Eotaxin-1                                     | 1EOT        | NMR   | Monomer              | wt                        | 32   |
| CCL15                  | MIP-5 (HCC-                                   | 2HCC        | NMR   | Monomer              | wt                        | 33   |
| CCL20                  | MIP-3 <sup>§</sup>                            | 1HA6        | NMR   | Monomer              | wt                        | 34   |
| CCL23                  | MPIF-1 (CK $\beta$ 8)                         | 1G91        | NMR   | Monomer              | wt                        | 35   |
| CCL24                  | Eotaxin-2 (MPIF-2/CK $\beta$ 6)               | 1EIG (1EIH) | NMR   | Monomer              | wt                        | 36   |
| CCL26                  | Eotaxin-3 (MIP-4 $\alpha$ )                   | 1G2S (1G2T) | NMR   | Monomer              | wt                        | 37   |
| <b>CX<sub>3</sub>C</b> |                                               |             |       |                      |                           |      |
| CX3CL1                 | Fraktaline                                    | 1B2T        | NMR   | Monomer              | Chemokine domain          | 38   |
|                        |                                               | 1F2L        | X-ray | N-terminal dimer     | Chemokine domain          | 39   |

Description of available three-dimensional structures of heparin classified by using the new nomenclature (40). wt, wild type.

\*For some NMR structures, the codes without and with parenthesis refers to the minimized mean structure, and the different ensemble members, respectively.

<sup>†</sup>The first 10 N-terminal residues of recombinant PF4 were replaced by the N-terminal residues of IL-8 sequence.

<sup>‡</sup>The amide proton of Leu-25 was modified into *N*-methyl to produce a monomeric protein.

<sup>§</sup>Structure of the murine protein.

1. Fairbrother, W. J., Reilly, D., Colby, T. J., Hesselgesser, J. & Horuk, R. (1994) *J. Mol. Biol.* **242**, 252–270.
2. Kim, K. S., Clark-Lewis, I. & Sykes, B. D. (1994) *J. Biol. Chem.* **269**, 32909–32915.
3. Qian, Y. Q., Johanson, K. O. & McDevitt, P. (1999) *J. Mol. Biol.* **294**, 1065–1072.
4. Shao, W., Jerva, L. F., West, J., Lolis, E. & Schweitzer, B. I. (1998) *Biochemistry* **37**, 8303–8313.
5. Zhang, X., Chen, L., Bancroft, D. P., Lai, C. K. & Maione, T. E. (1994) *Biochemistry* **33**, 8361–8366.
6. Mayo, K. H., Roongta, V., Ilyina, E., Milius, R., Barker, S., Quinlan, C., La Rosa, G. & Daly, T. J. (1995) *Biochemistry* **34**, 11399–11409.
7. Malkowski, M. G., Wu, J. Y., Lazar, J. B., Johnson, P. H. & Edwards, B. F. (1995) *J. Biol. Chem.* **270**, 7077–7087.
8. Malkowski, M. G., Lazar, J. B., Johnson, P. H. & Edwards, B. F. (1997) *J. Mol. Biol.* **266**, 367–380.
9. Young, H., Roongta, V., Daly, T. J. & Mayo, K. H. (1999) *Biochem. J.* **338**, 591–598.
10. Clore, G. M., Appella, E., Yamada, M., Matsushima, K. & Gronenborn, A. M. (1990) *Biochemistry* **29**, 1689–1696.
11. Baldwin, E. T., Weber, I. T., St Charles, R., Xuan, J. C., Appella, E., Yamada, M., Matsushima, K., Edwards, B. F., Clore, G. M., Gronenborn, A. M. & Wlodawer, A. (1991) *Proc. Natl. Acad. Sci. USA* **88**, 502–506.
12. Rajarathnam, K., Clark-Lewis, I. & Sykes, B. D. (1995) *Biochemistry* **34**, 12983–12990.
13. Eigenbrot, C., Lowman, H. B., Chee, L. & Artis, D. R. (1997) *Proteins* **27**, 556–566.
14. Skelton, N. J., Quan, C., Reilly, D. & Lowman, H. (1999) *Struct. Fold. Des.* **7**, 157–168.
15. Gerber, N., Lowman, H., Artis, D. R. & Eigenbrot, C. (2000) *Proteins* **38**, 361–367.
16. Crump, M. P., Gong, J. H., Loetscher, P., Rajarathnam, K., Amara, A., Arenzana-Seisdedos, F., Virelizier, J. L., Baggiolini, M., Sykes, B. D. & Clark-Lewis, I. (1997) *EMBO J.* **16**, 6996–7007.

17. Dealwis, C., Fernandez, E. J., Thompson, D. A., Simon, R. J., Siani, M. A. & Lolis, E. (1998) *Proc. Natl. Acad. Sci. USA* **95**, 6941–6946.
18. Ohnishi, Y., Senda, T., Nandhagopal, N., Sugimoto, K., Shioda, T., Nagal, Y. & Mitsui, Y. (2000) *J. Interferon Cytokine Res.* **20**, 691–700.
19. Keizer, D. W., Crump, M. P., Lee, T. W., Slupsky, C. M., Clark-Lewis, I. & Sykes, B. D. (2000) *Biochemistry* **39**, 6053–6059.
20. Handel, T. M. & Domaille, P. J. (1996) *Biochemistry* **35**, 6569–6584.
21. Lubkowski, J., Bujacz, G., Boque, L., Domaille, P. J., Handel, T. M. & Wlodawer, A. (1997) *Nat. Struct. Biol.* **4**, 64–69.
22. Czaplowski, L. G., McKeating, J., Craven, C. J., Higgins, L. D., Appay, V., Brown, A., Dudgeon, T., Howard, L. A., Meyers, T., Owen, J., *et al.* (1999) *J. Biol. Chem.* **274**, 16077–16084.
23. Lodi, P. J., Garrett, D. S., Kuszewski, J., Tsang, M. L., Weatherbee, J. A., Leonard, W. J., Gronenborn, A. M. & Clore, G. M. (1994) *Science* **263**, 1762–1767.
24. Kim, S., Jao, S., Laurence, J. S. & LiWang, P. J. (2001) *Biochemistry* **40**, 10782–10791.
25. Skelton, N. J., Aspiras, F., Ogez, J. & Schall, T. J. (1995) *Biochemistry* **34**, 5329–5342.
26. Chung, C. W., Cooke, R. M., Proudfoot, A. E. & Wells, T. N. (1995) *Biochemistry* **34**, 9307–9314.
27. Wilken, J., Hoover, D., Thompson, D. A., Barlow, P. N., McSparron, H., Picard, L., Wlodawer, A., Lubkowski, J. & Kent, S. B. (1999) *Chem. Biol.* **6**, 43–51.
28. Hoover, D. M., Shaw, J., Gryczynski, Z., Proudfoot, A. E. I. & Wells, T. (2000) *Protein Pept. Lett.* **7**, 73–82.
29. Kim, K. S., Rajarathnam, K., Clark-Lewis, I. & Sykes, B. D. (1996) *FEBS Lett.* **395**, 277–282.
30. Meunier, S., Bernassau, J. M., Guillemot, J. C., Ferrara, P. & Darbon, H. (1997) *Biochemistry* **36**, 4412–4422.
31. Blaszczyk, J., Coillie, E. V., Proost, P., Van Damme, J., Opdenakker, G., Bujacz, G. D., Wang, J. M. & Ji, X. (2000) *Biochemistry* **39**, 4075–14081.
32. Crump, M. P., Rajarathnam, K., Kim, K. S., Clark-Lewis, I. & Sykes, B. D. (1998) *J. Biol. Chem.* **273**, 22471–22479.
33. Sticht, H., Escher, S. E., Schweimer, K., Forssmann, W. G., Rosch, P. & Adermann, K. (1999) *Biochemistry* **38**, 5995–6002.

34. Pérez-Cañadillas, J. M., Zaballos, Á., Gutiérrez, J., Varona, R., Roncal, F., Albar, J. P., Márquez, G. & Bruix, M. (2001) *J. Biol. Chem.* **276**, 28372–28379.
35. Rajarathnam, K., Li, Y., Rohrer, T. & Gentz, R. (2001) *J. Biol. Chem.* **276**, 4909–4916.
36. Mayer, K. L. & Stone, M. J. (2000) *Biochemistry* **39**, 8382–8395.
37. Ye, J., Mayer, K. L., Mayer, M. R. & Stone, M. J. (2001) *Biochemistry* **40**, 7820–7831.
38. Mizoue, L. S., Bazan, J. F., Johnson, E. C. & Handel, T. M. (1999) *Biochemistry* **38**, 1402–1414.
39. Hoover, D. M., Mizoue, L. S., Hanel, T. M. & Lubkowski, J. (2000) *J. Biol. Chem.* **275**, 23187–23193.
40. Rossi, D. & Zlotnik, A. (2000) *Annu. Rev. Immunol.* **18**, 217–242.
