# Supplementary material
Source: PubMed Central journal article supplement (PMC122172)
Supplement: pnas_99_3_1229__3.pdf [file pnas_99_3_1229__3.pdf]

**Table 3. Description of the geometries of heparin fragments in the bound state**

|                      | IL-8             |                   | SDF-1             |                   | RANTES           |                   | CDF              |                   | PF-4*            |                   |
|----------------------|------------------|-------------------|-------------------|-------------------|------------------|-------------------|------------------|-------------------|------------------|-------------------|
|                      | $\Phi$           | $\Psi$            | $\Phi$            | $\Psi$            | $\Phi$           | $\Psi$            | $\Phi$           | $\Psi$            | $\Phi$           | $\Psi$            |
| $\alpha$ -D-Glc(1-4) | 76               | -147 <sup>†</sup> | 57                | -166 <sup>†</sup> | 77               | -149 <sup>†</sup> | 92               | -140 <sup>†</sup> | 76               | -147 <sup>†</sup> |
| $\beta$ -L-IdoA(1-4) | -70 <sup>†</sup> | -111              | -68 <sup>†</sup>  | -103              | -74 <sup>†</sup> | -112              | -75 <sup>†</sup> | -125              | -71 <sup>†</sup> | -107              |
| $\alpha$ -D-Glc(1-4) | 78               | -150 <sup>†</sup> | 82                | -155 <sup>†</sup> | 76               | -139 <sup>†</sup> | 81               | -148 <sup>†</sup> | 75               | -149 <sup>†</sup> |
| $\beta$ -L-IdoA(1-4) | -76 <sup>†</sup> | -103              | -39 <sup>†</sup>  | -85               | -80 <sup>†</sup> | -125              | -75 <sup>†</sup> | -105              | -72 <sup>†</sup> | -99               |
| $\alpha$ -D-Glc(1-4) | 144              | -91 <sup>‡</sup>  | 80                | -156 <sup>†</sup> | 92               | -60 <sup>‡</sup>  | 134              | -92 <sup>‡</sup>  | 123              | -88 <sup>‡</sup>  |
| $\beta$ -L-IdoA(1-4) | -84 <sup>‡</sup> | 176               | -137 <sup>†</sup> | -122              | -90 <sup>‡</sup> | -159              | -83 <sup>‡</sup> | 178               | -80 <sup>‡</sup> | -178              |
| $\alpha$ -D-Glc(1-4) | 81               | -153 <sup>†</sup> | 99                | -101 <sup>†</sup> | 83               | -109 <sup>†</sup> | 79               | -148 <sup>†</sup> | 82               | -145 <sup>†</sup> |
| $\beta$ -L-IdoA(1-4) | -74 <sup>†</sup> | -102              | -75 <sup>†</sup>  | -107              | -78 <sup>†</sup> | -173              | -69 <sup>†</sup> | -105              | -67 <sup>†</sup> | -114              |
| $\alpha$ -D-Glc(1-4) | 78               | -150 <sup>†</sup> | 75                | -154 <sup>†</sup> | 124              | -97 <sup>‡</sup>  | 74               | -149 <sup>†</sup> | 73               | -151 <sup>†</sup> |
| $\beta$ -L-IdoA(1-4) | -70 <sup>†</sup> | -103              | -58 <sup>†</sup>  | -94               | -61 <sup>†</sup> | -146              | -69 <sup>†</sup> | -106              | -71 <sup>†</sup> | -107              |
| $\alpha$ -D-Glc(1-4) | 62               | -153 <sup>†</sup> | 68                | -173 <sup>†</sup> | 101              | -79 <sup>‡</sup>  | 71               | -148 <sup>†</sup> | 74               | -151 <sup>†</sup> |
| $\beta$ -L-IdoA(1-4) | -60 <sup>†</sup> | -95               | -64 <sup>†</sup>  | -97               | -81 <sup>†</sup> | -176              | -68 <sup>†</sup> | -102              | -82 <sup>†</sup> | -106              |
| $\alpha$ -D-Glc(1-4) | 117              | -77 <sup>‡</sup>  | 49                | -174 <sup>†</sup> | 49               | 180 <sup>†</sup>  | 136              | -90 <sup>‡</sup>  | 115              | -85 <sup>‡</sup>  |
| $\beta$ -L-IdoA(1-4) | -75 <sup>‡</sup> | 177               | -64 <sup>†</sup>  | -97               |                  |                   | -78 <sup>‡</sup> | 174               | -79 <sup>‡</sup> | -177              |
| $\alpha$ -D-Glc(1-4) | 72               | -160 <sup>†</sup> |                   |                   |                  |                   | 72               | -166 <sup>†</sup> | 79               | -149 <sup>†</sup> |
| $\beta$ -L-IdoA(1-4) | -68 <sup>†</sup> | -103              |                   |                   |                  |                   | -71 <sup>†</sup> | -103              | -77 <sup>†</sup> | -106              |
| $\alpha$ -D-Glc(1-4) | 88               | -154 <sup>†</sup> |                   |                   |                  |                   | 80               | -146 <sup>†</sup> | 120              | -85 <sup>‡</sup>  |
| $\beta$ -L-IdoA(1-4) |                  |                   |                   |                   |                  |                   |                  |                   | -79              | -179              |
| $\alpha$ -D-Glc(1-4) |                  |                   |                   |                   |                  |                   |                  |                   | 79               | -148 <sup>†</sup> |
| $\beta$ -L-IdoA(1-4) |                  |                   |                   |                   |                  |                   |                  |                   | -67 <sup>†</sup> | -104              |

\*Values averaged from the two heparin fragment (deviation less than 1° after optimization).

<sup>†</sup>With adjacent L-IdoA ring in <sup>1</sup>C<sub>4</sub> conformation.

<sup>‡</sup>With adjacent L-IdoA ring in <sup>2</sup>S<sub>O</sub> conformation.
